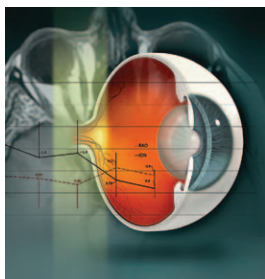

## ON THE COVER:

Perioperative ischemic optic neuropathy (ION) can cause visual loss during spinal surgery. In this issue of *ANESTHESIOLOGY*, Rubin *et al.* employ a large nationwide administrative hospital database to assess trends and risk factors for ION and demonstrate that perioperative ION in spinal fusion is decreasing. In an accompanying Editorial View, Todd discusses why the rate of ION might be on the decline.

- Rubin *et al.*: Perioperative Visual Loss in Spine Fusion Surgery: Ischemic Optic Neuropathy in the United States from 1998 to 2012 in the Nationwide Inpatient Sample, p. 457
- Todd: Good News: But Why Is the Incidence of Postoperative Ischemic Optic Neuropathy Falling?, p. 445

## ◆ THIS MONTH IN ANESTHESIOLOGY

1A

## ■ SCIENCE, MEDICINE, AND THE ANESTHESIOLOGIST

15A

## ■ INFOGRAPHICS IN ANESTHESIOLOGY

17A

## ◆ EDITORIAL VIEWS

### Good News: But Why Is the Incidence of Postoperative Ischemic Optic Neuropathy Falling?

445

*M. M. Todd*

### Oxygen Therapy: When Is Too Much Too Much?

449

*S. Shaefi, D. S. Talmor, and B. Subramaniam*

### Lipid Emulsion in Local Anesthetic Toxicity: Long-winded, Rude, and Right

451

*M. Harvey and G. Cave*

### Duloxetine for Subacute Pain Management after Total Knee Arthroplasty: Should We Write It Off or Reevaluate?

454

*M. B. Jacobs and S. P. Cohen*

## ■ PERIOPERATIVE MEDICINE

## CLINICAL SCIENCE

### ◆◆ Perioperative Visual Loss in Spine Fusion Surgery: Ischemic Optic Neuropathy in the United States from 1998 to 2012 in the Nationwide Inpatient Sample

457

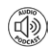

*D. S. Rubin, I. Parakati, L. A. Lee, H. E. Moss, C. E. Joslin, and S. Roth*

In the Nationwide Inpatient Sample for 1998 to 2012, procedure codes for spine surgery and diagnostic codes for ischemic optic neuropathy were identified. It was found that perioperative ischemic optic neuropathy in spinal fusion significantly decreased from 1998 to 2012 by about 2.7-fold. Aging, male sex, transfusion, and obesity significantly increased the risk.

◆ Refers to This Month in Anesthesiology

◆ Refers to Editorial Views

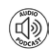

This article has an Audio Podcast

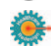

This is a Healthcare Redesign article

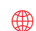

See Supplemental Digital Content

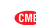

CME Article

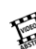

This article has a Video Abstract

- ◆◆ **A Multicenter, Randomized, Controlled Phase IIb Trial of Avoidance of Hyperoxemia during Cardiopulmonary Bypass** 465  
*S. P. McGuinness, R. L. Parke, K. Drummond, T. Willcox, and M. Bailey, on behalf of the SO-COOL investigators*  
 The authors provide the first multicenter, randomized control trial to address the potential of organ injury from perioperative hyperoxemia during cardiopulmonary bypass. The authors show that avoiding hyperoxemia during cardiopulmonary bypass was safe but failed to demonstrate a difference in organ damage.
- ◆◆🌐 **Effect of Intralipid® on the Dose of Ropivacaine or Levobupivacaine Tolerated by Volunteers: A Clinical and Pharmacokinetic Study** 474  
*P. Dureau, B. Charbit, N. Nicolas, D. Benhamou, and J.-X. Mazoit*  
 In a crossover study conducted in 16 volunteers, a lipid emulsion infusion begun 2 min after initiating an infusion of ropivacaine or levobupivacaine did not affect the times to early signs of central nervous system toxicity. Peak local anesthetic concentrations at the end of the local anesthetic infusions decreased by 26 to 30% due to an increase in the central volume of a multicompartmental pharmacokinetic model. Pharmacokinetic simulations suggest that a lipid emulsion might prevent the rapid increase of local anesthetic concentrations after extravascular administration.
- ◆🌐 **Electronically Mediated Time-out Initiative to Reduce the Incidence of Wrong Surgery: An Interventional Observational Study** 484  
*B. S. Rothman, M. S. Shotwell, R. Beebe, J. P. Wanderer, J. M. Ehrenfeld, N. Patel, and W. S. Sandberg*  
 Implementation of a mandatory, electronic time-out process before incision is feasible and inexpensive and has minimal impact on operating room efficiency. Given the rarity of wrong surgery, there is substantial uncertainty about whether true performance improvements occur with this approach.
- 🌐 **Methodologic Considerations for Collecting Patient-reported Outcomes from Unselected Surgical Patients** 495  
*D. L. Helsten, A. Ben Abdallah, M. S. Avidan, T. S. Wildes, A. Winter, S. McKinnon, M. Bollini, P. Candelario, B. A. Burnside, and A. Sharma*  
 A process for including rigorous preoperative health information, tracking patients' perioperative courses, and obtaining postoperative patient-reported outcomes 30 days and 1-yr after hospital discharge can be successfully assimilated in the organizational workflow of a busy academic hospital. Patient engagement, informed consent, strong support from leadership, and buy-in from frontline clinicians are helpful in sustaining such programs. In addition to electronic surveys, paper surveys and telephone interviews are essential to capturing a large surgical sample.
- ◆ **Single-dose Antibiotic Prophylaxis in Regional Anesthesia: A Retrospective Registry Analysis** 505  
*H. Bomberg, D. Krotten, C. Kubulus, S. Wagenpfeil, P. Kessler, T. Steinfeldt, T. Standl, A. Gottschalk, J. Stork, W. Meissner, J. Birnbaum, T. Koch, D. I. Sessler, T. Volk, and A. Raddatz*  
 In the German Network for Regional Anesthesia database, 11,307 patients receiving epidural or perineural catheters and single-shot antibiotics were propensity matched with the same number of individuals who did not receive antibiotics. The adjusted odds ratio for infection, primarily defined as the presence of at least two of the symptoms redness, edema, or pressure/pain leading to catheter removal, was 2.02 (95% CI, 1.4 to 2.8) for peripheral catheters and 1.94 (95% CI, 1.6 to 2.4) for nonobstetrical epidural catheters.
- 📺◆ **Combined Spinal Epidural Technique for Labor Analgesia Does Not Delay Recognition of Epidural Catheter Failures: A Single-center Retrospective Cohort Survival Analysis** 516  
*J. M. Booth, J. C. Pan, V. H. Ross, G. B. Russell, L. C. Harris, and P. H. Pan*  
 Since combined spinal epidural catheters are not fully tested initially, there is concern that recognition of epidural catheter failures may be delayed. Combined spinal epidural does not delay recognition of epidural catheter failures *versus* epidural.
- ◆📺 **Effects of Depth of Propofol and Sevoflurane Anesthesia on Upper Airway Collapsibility, Respiratory Genioglossus Activation, and Breathing in Healthy Volunteers** 525  
*J. C. P. Simons, E. Pierce, D. Diaz-Gil, S. A. Malviya, M. J. Meyer, F. P. Timm, J. B. Stokholm, C. E. Rosow, R. M. Kacmarek, and M. Eikermann*  
 This randomized controlled crossover study in healthy human volunteers first examined effects of equivalent anesthesia doses of sevoflurane and propofol on pharyngeal airway dilating muscle activity and upper airway collapsibility. Propofol and sevoflurane anesthesia increased upper airway closing pressure in a dose-dependent fashion with no difference at equivalent anesthetic concentrations, possibly mediated by a dose-dependent reduction of genioglossus muscle activation.

## BASIC SCIENCE

 **$\alpha_2$ -Adrenergic Receptor and Isoflurane Modulation of Presynaptic  $\text{Ca}^{2+}$  Influx and Exocytosis in Hippocampal Neurons**

535

*M. Hara, Z.-Y. Zhou, and H. C. Hemmings, Jr.*

Using quantitative imaging of fluorescent biosensors of action potential-evoked synaptic vesicle exocytosis (synaptophysin-pHluorin) and  $\text{Ca}^{2+}$  influx (GCaMP6) in cultured rat hippocampal neurons, it was found that synaptic vesicle exocytosis was inhibited by both dexmedetomidine and clonidine in proportion to reduced  $\text{Ca}^{2+}$  entry. These effects were specifically due to activation of  $\alpha_{2A}$ -adrenoceptors and were additive with inhibition of release by isoflurane.

## ■ CRITICAL CARE MEDICINE

## BASIC SCIENCE

**Adenosine Receptor Adora2b Plays a Mechanistic Role in the Protective Effect of the Volatile Anesthetic Sevoflurane during Liver Ischemia/Reperfusion**

547

*T. F. Granja, D. Köhler, J. Schad, C. B. de Oliveira Franz, F. Konrad, M. Hoch-Gutbrod, A. Streifßenberger, P. Rosenberger, and A. Straub*

Sevoflurane inhibited platelet activation and platelet–neutrophil conjugate formation in human blood *ex vivo* and reduced systemic inflammation, platelet–neutrophil conjugate formation, and organ damage in a mouse model of liver ischemia/reperfusion injury. The organ-protective and antiinflammatory effects of sevoflurane are reduced in genetically modified mice not expressing adenosine 2B receptors, indicating a critical role for this signaling pathway.

## ■ PAIN MEDICINE

## CLINICAL SCIENCE

**◆◆ Duloxetine and Subacute Pain after Knee Arthroplasty when Added to a Multimodal Analgesic Regimen: A Randomized, Placebo-controlled, Triple-blinded Trial**

561

*J. T. YaDeau, C. M. Brummett, D. J. Mayman, Y. Lin, E. A. Goytizolo, D. E. Padgett, M. M. Alexiades, R. L. Kahn, K. M. Jules-Elysee, K. G. Fields, A. K. Goon, Y. Gadulov, and G. Westrich*

In a triple-blinded, randomized control trial of duloxetine, 60 mg/day for 14 days begun on the day of total knee arthroplasty *versus* placebo in 106 patients, duloxetine failed to reduce pain with ambulation on postoperative day 14, the primary outcome.

## BASIC SCIENCE

**Microglial Inhibition Influences XCL1/XCR1 Expression and Causes Analgesic Effects in a Mouse Model of Diabetic Neuropathy**

573

*M. Zychowska, E. Rojewska, A. Piotrowska, G. Kreiner, and J. Mika*

Using the mice streptozotocin model of diabetic neuropathy, it was observed that chemokine-C-motif ligand 1 was up-regulated in microglial cells, while chemokine-C-motif receptor 1 was found to be expressed on spinal neurons. The administration of the glial inhibitor minocycline or anti-chemokine-C-motif ligand 1 antibodies reduced tactile allodynia and thermal hyperalgesia.

## ■ CLASSIC PAPERS REVISITED

**From Bench to Bedside and Back Again: A Personal Journey with Dexmedetomidine**

590

*M. Maze*

This article is a revisiting of original material published as: Segal IS, Vickery RG, Walton JK, Doze VA, Maze M: Dexmedetomidine diminishes halothane anesthetic requirements in rats through a postsynaptic alpha 2 adrenergic receptor. *ANESTHESIOLOGY* 1988; 69:818–23.

## CONTENTS

### ■ EDUCATION

#### IMAGES IN ANESTHESIOLOGY

- Gastric Ultrasound** 595  
*K. El-Boghdadly, R. Kruisselbrink, V. W. S. Chan, and A. Perlas*
- Modified Nasal Trumpet for Airway Management** 596  
*U. Yoon and I. Yuan*
- Vein of Galen Malformation and High-output Cardiac Failure** 597  
*A. Smith, T. Abruzzo, and M. Mahmoud*
- Tarlov Cysts: Incidental Finding during Subarachnoid Drain Placement** 598  
*V. Arora and I. Rozet*

#### MIND TO MIND

- Beneath the Furrowed Brow: A Ketamine Journey in the ER** 599  
*C. W. Platt*

### ■ CORRESPONDENCE

- Scottish Airway Pioneers and Historical Accuracy** 602  
*R. V. Trubuhovich*
- In Reply**  
*G. S. Bause*
- 
- Proof of Concept—How to Bridge Proof with Concept and Linked to Reality** 602  
*K. Laudanski and M. Gayed*
- In Reply**  
*S. Avramescu, D.-S. Wang, R. L. Horner, and B. A. Orser*
- 
- Unmasking of Focal Neurologic Dysfunction Caused by Sedation: Concerns and Ambiguity** 605  
*G. S. Tomar and P. K. Bithal,*
- In Reply**  
*N. Lin, R. Han, J. Zhou, and A. W. Gelb*

### ■ REVIEWS OF EDUCATIONAL MATERIAL

607

### ■ ERRATUM

- Fibrin Network Changes in Neonates after Cardiopulmonary Bypass: Erratum** 610
- Perioperative Comparative Effectiveness of Anesthetic Technique in Orthopedic Patients: Erratum** 610
- Radial Artery Pseudoaneurysm: A Rare Complication with Serious Risk to Life and Limb: Erratum** 610
- Icteric Vocal Cords Recorded during Video Laryngoscopy: Erratum** 610

### ■ CAREERS & EVENTS

19A

## INSTRUCTIONS FOR AUTHORS

The most recently updated version of the Instructions for Authors is available at [www.anesthesiology.org](http://www.anesthesiology.org). Please refer to the Instructions for the preparation of any material for submission to ANESTHESIOLOGY.

Manuscripts submitted for consideration for publication must be submitted in electronic format. The preferred method is via the Journal's Web site (<http://www.anesthesiology.org>). Detailed directions for submissions and the most recent version of the Instructions for Authors can be found on the Web site (<http://www.anesthesiology.org>). Books and educational materials should be sent to Alan Jay Schwartz M.D., M.S.Ed., Director of Education, Department of Anesthesiology and Critical Care Medicine, The Children's Hospital of Philadelphia, 34th Street and Civic Center Blvd., Room 9327, Philadelphia, Pennsylvania 19104-4399. Requests for permission to duplicate materials published in ANESTHESIOLOGY should be submitted in electronic format, to the Permissions Department ([journalpermissions@lww.com](mailto:journalpermissions@lww.com)). Advertising and related correspondence should be addressed to Advertising Manager, ANESTHESIOLOGY, Wolters Kluwer Health, Inc., Two Commerce Square, 2001 Market Street, Philadelphia, Pennsylvania 19103 (Web site: <http://www.wkadcenter.com/>). Publication of an advertisement in ANESTHESIOLOGY does not constitute endorsement by the Society or Lippincott Williams & Wilkins, Inc. of the product or service described therein or of any representations made by the advertiser with respect to the product or service.

**ANESTHESIOLOGY** (ISSN 0003-3022) is published monthly by Wolters Kluwer Health, Inc., 14700 Citicorp Drive, Bldg 3, Hagerstown, MD 21742. Business office: Two Commerce Square, 2001 Market Street, Philadelphia, PA 19103. Periodicals postage paid at Hagerstown, MD, and at additional mailing offices. Copyright © 2016, the American Society of Anesthesiologists, Inc.

**Annual Subscription Rates:** *United States*—\$835 Individual, \$1714 Institution, \$335 In-training. *Rest of World*—\$881 Individual, \$1904 Institution, \$335 In-training. Single copy rate \$152. Subscriptions outside of North America must add \$53 for airfreight delivery. Add state sales tax, where applicable. The GST tax of 7% must be added to all orders shipped to Canada (Lippincott Williams & Wilkins' GST Identification #895524239, Publications Mail Agreement #1119672). Indicate in-training status and name of institution. Institution rates apply to libraries, hospitals, corporations, and partnerships of three or more individuals. Subscription prices outside the United States must be prepaid. Prices subject to change without notice. Subscriptions will begin with currently available issue unless otherwise requested. Visit us online at [www.lww.com](http://www.lww.com).

Individual and in-training subscription rates include print and access to the online version. Online-only subscriptions for individuals (\$285) and persons in training (\$285) are available to nonmembers and may be ordered by downloading a copy of the Online Subscription FAXback Form from the Web site, completing the information requested, and faxing the completed form to 301-223-2400/44 (0) 20 7981 0535. Institutional rates are for print only; online subscriptions are available via Ovid. Institutions can choose to purchase a print and online subscription together for a discounted rate. Institutions that wish to purchase a print subscription, please contact Wolters Kluwer Health, Inc., 16522 Hunters Green Parkway, Hagerstown, MD 21740-2116; phone: 1-800-638-3030 (outside the United States 301-223-2300/44 (0) 20 7981 0525); fax: 301-223-2400/44 (0) 20 7981 0535. Institutions that wish to purchase an online subscription or online with print, please contact the Ovid Regional Sales Office near you or visit [www.ovid.com/site/index.jsp](http://www.ovid.com/site/index.jsp) and select Contact and Locations.

**Address for non-member subscription information, orders, or change of address:** Wolters Kluwer Health, Inc., 16522 Hunters Green Parkway, Hagerstown, MD 21740-2116; phone: 1-800-638-3030 (outside the United States 301-223-2300/44 (0) 20 7981 0525); fax: 301-223-2400/44 (0) 20 7981 0535; email: [customerservice@lww.com](mailto:customerservice@lww.com). In Japan, contact LWW Japan Ltd., 3-23-14 Hongo, Bunkyo-ku, Tokyo 113, Japan; phone: 81-3-5689-5400; fax: 81-3-5689-5402; email: [bclaim@lww.co.jp](mailto:bclaim@lww.co.jp). In Bangladesh, India, Nepal, Pakistan, and Sri Lanka, contact Globe Publications Pvt. Ltd., B-13 3rd Floor, A Block, Shopping Complex, Naraina, Vihar, Ring Road, New Delhi 110028, India; phone: 91-11-25770411; fax: 91-11-25778876; email: [info@globepub.com](mailto:info@globepub.com).

**Address for member subscription information, orders, or change of address:** Members of the American Society of Anesthesiologists receive the print and online journal with their membership. To become a member or provide a change of address, please contact the American Society of Anesthesiologists, 1061 American Lane, Schaumburg, Illinois 60173-4973; phone: 847-825-5586; fax: 847-825-1692; email: [membership@ASAhq.org](mailto:membership@ASAhq.org). For all other membership inquiries, contact Wolters Kluwer Health, Inc., Customer Service Department, P.O. Box 1580, Hagerstown, MD 21741-1580; phone: 1-800-638-3030 (outside the United States 301-223-2300/44 (0) 20 7981 0525); fax: 301-223-2400/44 (0) 20 7981 0535; email: [memberservice@lww.com](mailto:memberservice@lww.com).

**Postmaster:** Send address changes to ANESTHESIOLOGY, P.O. BOX 1550, Hagerstown, MD 21740.

**Advertising:** Please contact Ryan Magee, National Sales Manager, Product & Services Advertising, Journals and Websites, Wolters Kluwer Health, Inc., Lippincott Williams & Wilkins, Two Commerce Square, Philadelphia, PA 19103; tel: (215) 521-8804, fax: (215) 521-8801, e-mail: [Ryan.Magee@wolterskluwer.com](mailto:Ryan.Magee@wolterskluwer.com). For classified advertising: Joe Anzuena, Recruitment Advertising Representative, Wolters Kluwer Health, Inc., Lippincott Williams & Wilkins, Two Commerce Square, 2001 Market Street, Philadelphia, PA 19103; tel: (215) 521-8532, fax: (215) 701-2410. e-mail: [Joe.Anzuena@wolterskluwer.com](mailto:Joe.Anzuena@wolterskluwer.com).
